# Supplementary material for: Multi-Transcriptomic Analysis Reveals the Heterogeneity and Tumor-Promoting Role of SPP1/CD44-Mediated Intratumoral Crosstalk in Gastric Cancer
Source: MDPI journal article supplement (doi:10.3390/cancers15010164), 2022-12-27
Supplement: s1 [file s1]

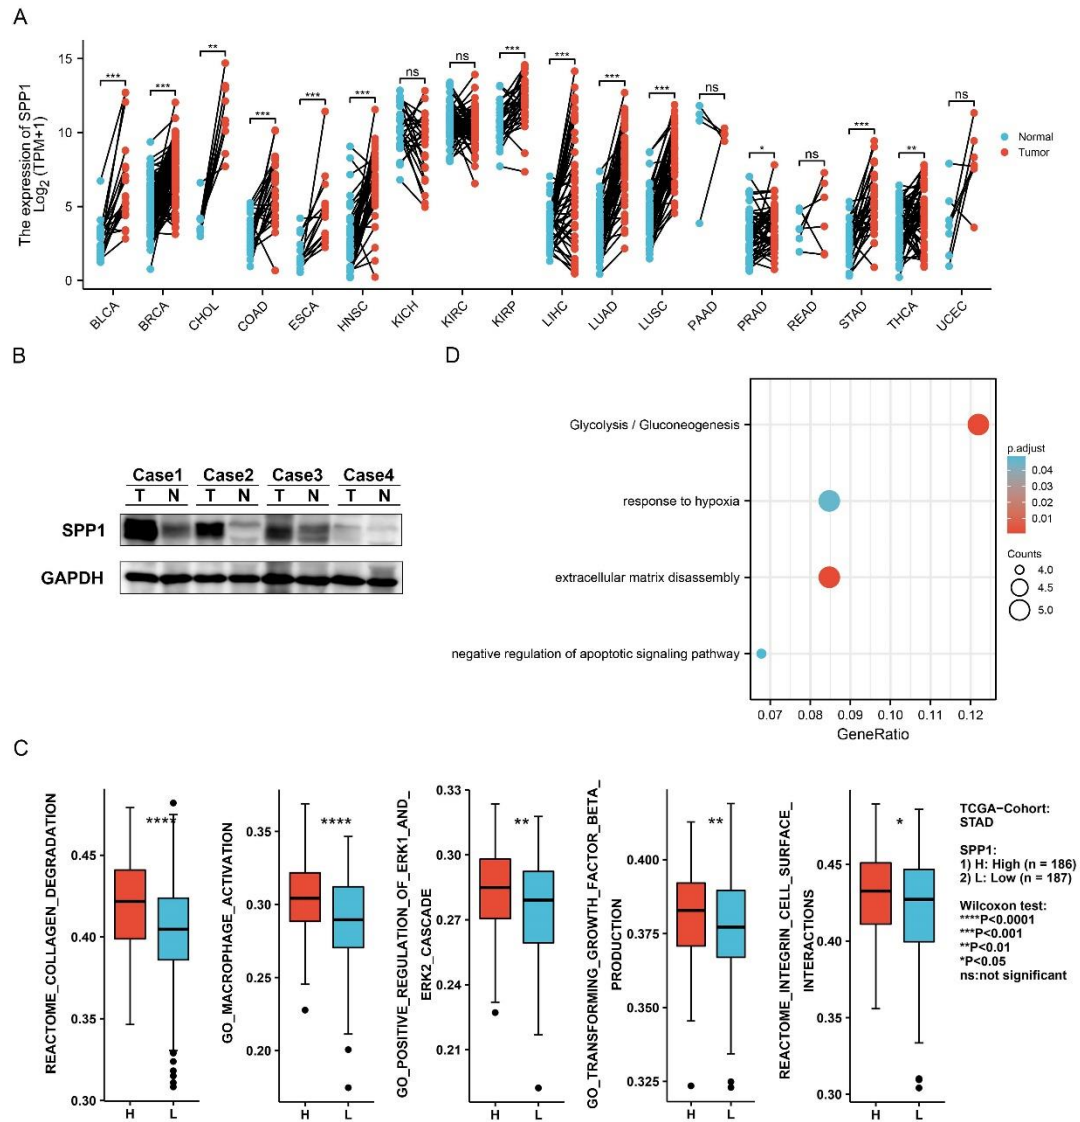

**Figure S1.** SPP1 expression and functional enrichment of SPP1-related genes

(A) Expression of SPP1 in paired samples from XENA-TCGA\_GTEEx. Wilcoxon rank-sum test. (B) Western blot showing the protein levels of SPP1 between GC and paired adjacent normal tissues. T, Tumor; N, Normal. (C) Bar plots showing the functional enrichment between the SPP1-High and SPP1-Low groups. (D) Dot plot showing the GO and KEGG analysis results of SPP1-predicted target genes.
