# Supplementary material for: Multi-Transcriptomic Analysis Reveals the Heterogeneity and Tumor-Promoting Role of SPP1/CD44-Mediated Intratumoral Crosstalk in Gastric Cancer
Source: Cancers (Basel). 2022 Dec 27;15(1):164. doi: 10.3390/cancers15010164 (PMC9818284; doi:10.3390/cancers15010164)
Supplement: Supplementary file 1 [file cancers-15-00164-s001.zip › Table S1.Representative samples of expanding and infiltrative types of GC in TCGA.xls]

## Sheet: Sheet1
Expanding-type GC	Infiltrative-type GC	Normal
TCGA-BR-8077-01A	TCGA-IN-7808-01A	TCGA-HU-A4GY-11A
TCGA-VQ-A91U-01A	TCGA-RD-A7BW-01A	TCGA-IP-7968-11A
TCGA-BR-7197-01A	TCGA-VQ-A927-01A	TCGA-CG-5721-11A
TCGA-D7-6527-01A	TCGA-HU-A4GP-01A	TCGA-HU-A4GC-11A
TCGA-HU-8604-01A	TCGA-BR-8371-01A	TCGA-HU-A4GH-11A
TCGA-HU-8249-01A	TCGA-BR-8588-01A	TCGA-HU-A4GP-11A
TCGA-BR-7715-01A	TCGA-VQ-A8DZ-01A	TCGA-BR-6454-11A
		TCGA-CG-5730-11A
		TCGA-HU-A4GN-11A
		TCGA-CG-5722-11A
		TCGA-BR-6457-11A
		TCGA-FP-7829-11A
		TCGA-IN-AB1X-11A
		TCGA-BR-7704-11A
		TCGA-BR-7703-11A
		TCGA-BR-6453-11A
		TCGA-BR-7717-11A
		TCGA-CG-5734-11A
		TCGA-HU-8238-11A
		TCGA-BR-6802-11A
		TCGA-HU-A4HB-11A
		TCGA-BR-7851-11A
		TCGA-CG-5728-11A
		TCGA-FP-7735-11A
		TCGA-BR-8060-11A
		TCGA-IN-AB1V-11A
		TCGA-BR-7715-11A
		TCGA-IN-7806-11A
		TCGA-CG-5733-11A
		TCGA-CG-5720-11A
		TCGA-BR-7716-11A
		TCGA-IN-8663-11A
